# Supplementary material for: α-Synuclein Oligomer Detection with Aptamer Switch on Reduced Graphene Oxide Electrode
Source: PubMed Central journal article supplement (PMC7711764; doi:10.3390/nano10050832), 2020-04-27
Supplement: nanomaterials-10-00832-s001.pdf [file nanomaterials-10-00832-s001.pdf]

Supplementary Materials

# $\alpha$ -synuclein oligomer detection with aptamer switch on reduced graphene oxide electrode

Seung Joo Jang<sup>†</sup>, Chang-Seuk Lee<sup>†</sup>, and Tae Hyun Kim<sup>\*</sup>

Department of Chemistry, Soonchunhyang University, Asan 31538, Korea; seen813@sch.ac.kr (S.J.J.); eriklee0329@sch.ac.kr (C.-S.L.)

\* Correspondence: thkim@sch.ac.kr; Tel.: +82-41-530-4722

<sup>†</sup> These authors contributed equally to this work.

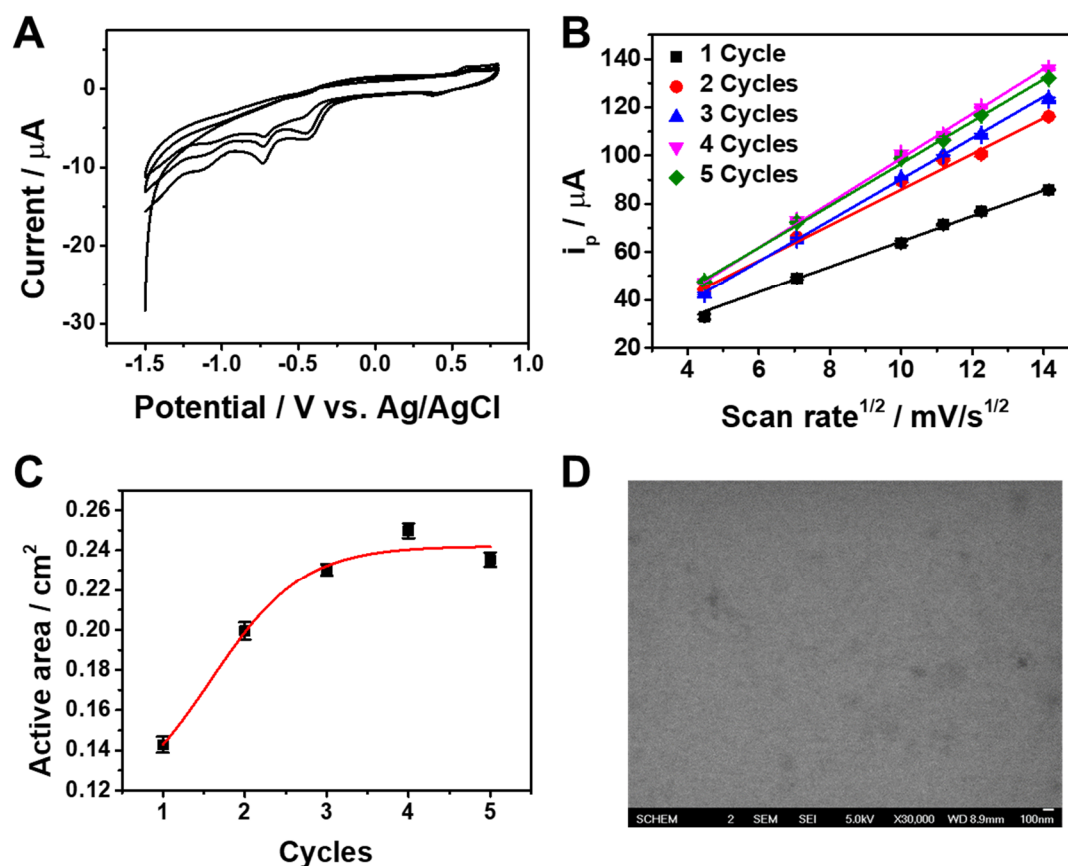

**Figure S1.** A. CV curves recorded at GCE in 10 mM PBS buffer solution (pH 7.4) containing  $0.3 \text{ mg mL}^{-1}$  GO at a scan rate of 10 mV for 3 cycles of CV. B. Relationship between peak current and square root of scan rate for oxidation of ERGO-GCEs with different number of CV cycles (1, 2, 3, 4, 5) in 0.1 M KCl containing 5 mM  $[\text{Fe}(\text{CN})_6]^{3-}$ . C. Plot of active surface areas of ERGO-GCEs with different number of CV cycles (1, 2, 3, 4, 5) in 0.1 M KCl containing 5 mM  $[\text{Fe}(\text{CN})_6]^{3-}$ . D. SEM image of bare GCE.

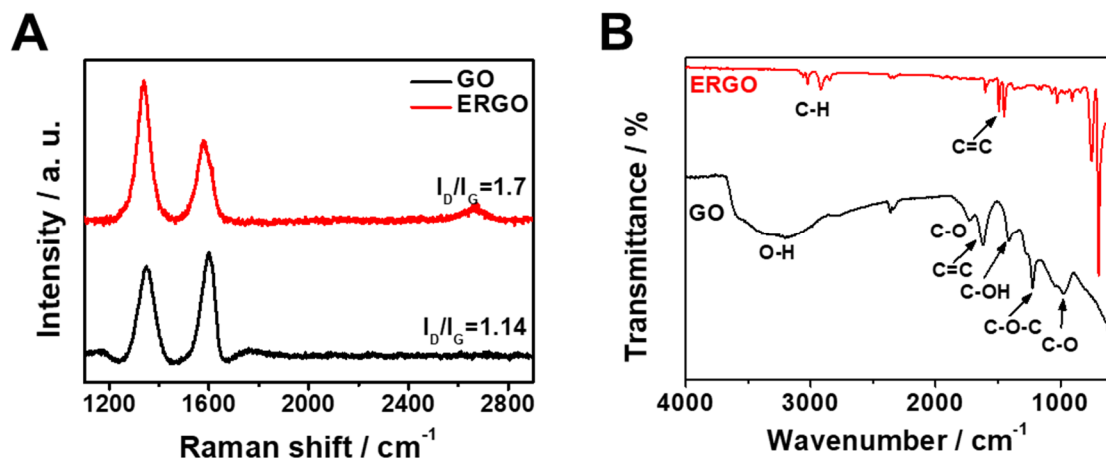

Figure S2. A. Raman spectra of GO and ERGO. B. FT-IR spectra of GO and ERGO.

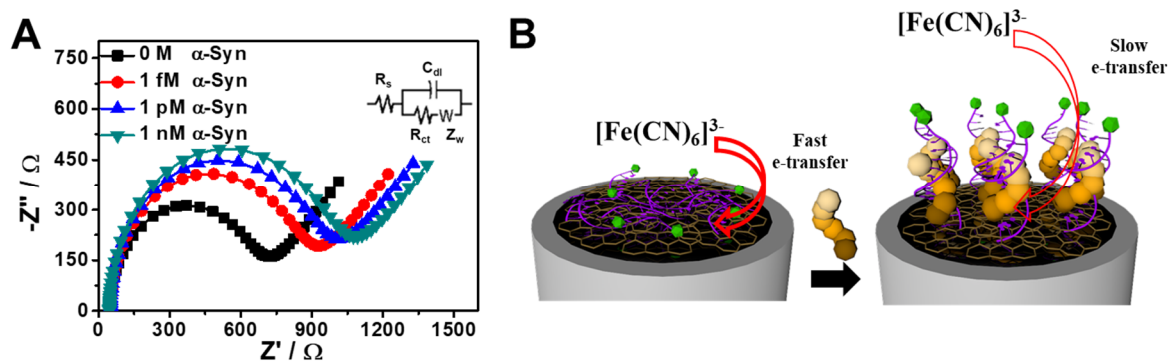

Figure S3. A. Nyquist plots for the Apt/ERGO-GCE in different concentrations of  $\alpha$ -syn oligomer (0 M, 1 fM, 1 pM, and 1 nM) in 0.1 M TBS buffer containing 5.0 mM  $[\text{Fe}(\text{CN})_6]^{3-}$ . B. Plausible sensing mechanism of Apt/ERGO-GCE for detection of  $\alpha$ -syn oligomer.

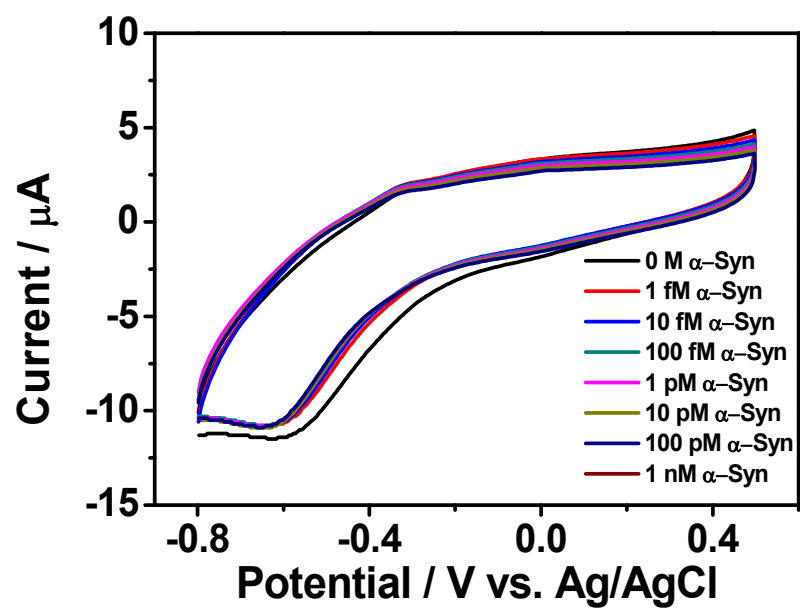

**Figure S4.** CV curves of Apt/ERGO-GCE at a scan rate of  $50 \text{ mV s}^{-1}$  upon the addition of different concentrations of  $\alpha$ -Syn oligomer (0 – 1 nM) in 0.1 M TBS buffer.
